# Supplementary material for: Protection From Retinopathy and Other Complications in Patients With Type 1 Diabetes of Extreme Duration: The Joslin 50-Year Medalist Study
Source: PubMed Central journal article supplement — Diabetes Care. 2011 Mar 21;34(4):968–74. doi: 10.2337/dc10-1675 (PMC3064059; doi:10.2337/dc10-1675), 2011-03-21
Supplement: supp_34.4.968v101675_DC101675SupplementaryData.pdf [file supp_34.4.968v101675_DC101675SupplementaryData.pdf]

Supplementary Table 1. Geographic Distribution of the Medalist Cohort

| <b>STATE</b> | <b>Frequency (N)</b> | <b>Percent (%)</b> |
|--------------|----------------------|--------------------|
|              |                      |                    |
| <b>MA</b>    | <b>56</b>            | <b>16.0</b>        |
| <b>NY</b>    | <b>30</b>            | <b>8.6</b>         |
| <b>FL</b>    | <b>25</b>            | <b>7.1</b>         |
| <b>CA</b>    | <b>24</b>            | <b>6.8</b>         |
| <b>PA</b>    | <b>17</b>            | <b>4.8</b>         |
| <b>MD</b>    | <b>13</b>            | <b>3.7</b>         |
| <b>VA</b>    | <b>13</b>            | <b>3.7</b>         |
| <b>MI</b>    | <b>11</b>            | <b>3.1</b>         |
| <b>OH</b>    | <b>11</b>            | <b>3.1</b>         |
| <b>IL</b>    | <b>10</b>            | <b>2.9</b>         |
| <b>NJ</b>    | <b>10</b>            | <b>2.9</b>         |
| <b>OR</b>    | <b>9</b>             | <b>2.6</b>         |
| <b>WA</b>    | <b>9</b>             | <b>2.6</b>         |
| <b>CT</b>    | <b>8</b>             | <b>2.3</b>         |
| <b>IN</b>    | <b>8</b>             | <b>2.3</b>         |
| <b>TX</b>    | <b>8</b>             | <b>2.3</b>         |
| <b>AZ</b>    | <b>7</b>             | <b>2.0</b>         |
| <b>ME</b>    | <b>7</b>             | <b>2.0</b>         |
| <b>TN</b>    | <b>7</b>             | <b>2.0</b>         |
| <b>MN</b>    | <b>6</b>             | <b>1.7</b>         |
| <b>NC</b>    | <b>6</b>             | <b>1.7</b>         |
| <b>NE</b>    | <b>5</b>             | <b>1.4</b>         |
| <b>CO</b>    | <b>4</b>             | <b>1.1</b>         |
| <b>MT</b>    | <b>4</b>             | <b>1.1</b>         |
| <b>NH</b>    | <b>4</b>             | <b>1.1</b>         |
| <b>SC</b>    | <b>4</b>             | <b>1.1</b>         |
| <b>WI</b>    | <b>4</b>             | <b>1.1</b>         |

|           |          |            |
|-----------|----------|------------|
| <b>IA</b> | <b>3</b> | <b>0.9</b> |
| <b>ID</b> | <b>3</b> | <b>0.9</b> |
| <b>KS</b> | <b>3</b> | <b>0.9</b> |
| <b>RI</b> | <b>3</b> | <b>0.9</b> |
| <b>UT</b> | <b>3</b> | <b>0.9</b> |
| <b>WV</b> | <b>3</b> | <b>0.9</b> |
| <b>AL</b> | <b>2</b> | <b>0.6</b> |
| <b>GA</b> | <b>2</b> | <b>0.6</b> |
| <b>NV</b> | <b>2</b> | <b>0.6</b> |
| <b>VT</b> | <b>2</b> | <b>0.6</b> |
| <b>AK</b> | <b>1</b> | <b>0.3</b> |
| <b>AR</b> | <b>1</b> | <b>0.3</b> |
| <b>HI</b> | <b>1</b> | <b>0.3</b> |
| <b>NM</b> | <b>1</b> | <b>0.3</b> |
| <b>OK</b> | <b>1</b> | <b>0.3</b> |

Supplementary Table 2. Risk Factor Profiles Among Diabetic Micro and Macrovascular Complications

|                                             | Retinopathy                                     |                                        |                | Nephropathy                                            |                                                     |                |
|---------------------------------------------|-------------------------------------------------|----------------------------------------|----------------|--------------------------------------------------------|-----------------------------------------------------|----------------|
|                                             | No-mild NPDR<br>Median [Q1, Q3] (N)<br>or % (N) | PDR<br>Median [Q1, Q3] (N)<br>or % (N) | <i>p</i> value | No microalbuminuria<br>Median [Q1, Q3] (N)<br>or % (N) | Microalbuminuria<br>Median [Q1, Q3] (N)<br>or % (N) | <i>p</i> value |
| Age (years)                                 | 68.5 [63.6, 74.0] (135)                         | 65.8 [61.1, 71.5] (163)                | 0.02           | 67.2 [62.0, 72.5] (299)                                | 69.6 [63.6, 76.0] (45)                              | 0.08           |
| Duration of diabetes (years)                | 55.0 [52.0, 60.0] (135)                         | 55.0 [52.0, 58.0] (163)                | 0.45           | 54.0 [52.0, 59.0] (299)                                | 57.0 [53.0, 65.0] (45)                              | 0.009          |
| Male Gender                                 | 45.9 (62)                                       | 47.9 (78)                              | 0.74           | 46.2 (138)                                             | 55.6 (25)                                           | 0.24           |
| + Smoking history                           | 38.6 (51)                                       | 42.7 (67)                              | 0.49           | 37.5 (108)                                             | 65.9 (27)                                           | <0.001         |
| Weight (kg)                                 | 73.0 [61.4, 81.9] (135)                         | 71.4 [62.7, 82.9] (162)                | 0.57           | 70.9 [62.0, 82.0] (296)                                | 75.7 [64.3, 82.6] (44)                              | 0.37           |
| Height (cm)                                 | 167.6 [160.0, 175.3] (135)                      | 165.2 [160.3, 174.0] (162)             | 0.63           | 166.4 [160.0, 175.3] (296)                             | 166.3 [160.0, 173.3] (44)                           | 0.64           |
| Systolic BP (mmHg)                          | 136.0 [122.0, 149.0] (94)                       | 132.0 [119.0, 146.0] (132)             | 0.12           | 134.0 [120.0, 148.0] (231)                             | 135.0 [124.0, 160.0] (38)                           | 0.37           |
| Diastolic BP (mmHg)                         | 60.0 [56.0, 68.0] (94)                          | 60.0 [56.0, 64.0] (132)                | 0.40           | 60.0 [56.0, 67.0] (231)                                | 60.0 [56.0, 68.0] (38)                              | 0.43           |
| Mean Arterial Pressure (mmHg)               | 86.3 [79.3, 94.0] (94)                          | 84.0 [78.0, 91.2] (132)                | 0.12           | 84.7 [78.7, 92.7] (231)                                | 86.0 [79.3, 96.0] (38)                              | 0.26           |
| Heart Rate (bpm)                            | 72.0 [64.0, 84.0] (94)                          | 76.0 [64.0, 84.0] (130)                | 0.19           | 72.0 [65.0, 84.0] (231)                                | 74.0 [64.0, 84.0] (37)                              | 0.52           |
| Current HbA1c (%)                           | 7.2 [6.7, 7.8] (131)                            | 7.2 [6.6, 7.9] (158)                   | 0.52           | 7.2 [6.6, 7.8] (292)                                   | 7.5 [6.6, 8.0] (43)                                 | 0.09           |
| Total cholesterol (mg/dL)                   | 164.0 [145.0, 183.5] (120)                      | 158.0 [136.0, 183.0] (143)             | 0.24           | 159.0 [139.0, 180.5] (268)                             | 171.5 [147.5, 196.5] (40)                           | 0.072          |
| Triglycerides (mg/dL)                       | 68.5 [46.0, 98.0] (120)                         | 67.0 [48.0, 94.0] (143)                | 0.82           | 64.0 [46.0, 90.5] (268)                                | 92.5 [64.0, 141.0] (40)                             | <0.001         |
| HDL (mg/dL)                                 | 61.5 [51.0, 78.0] (120)                         | 59.0 [46.0, 75.0] (143)                | 0.12           | 59.0 [47.0, 73.5] (268)                                | 55.5 [46.0, 82.0] (40)                              | 0.83           |
| LDL (mg/dL)                                 | 82.5 [69.0, 99.0] (120)                         | 83.0 [71.0, 97.0] (143)                | 0.75           | 83.0 [68.0, 98.0] (268)                                | 86.5 [77.5, 100.5] (40)                             | 0.19           |
| LP(a) (mg/dL)                               | 9.1 [4.6, 17.0] (56)                            | 13.0 [5.5, 32.8] (60)                  | 0.10           | 8.7 [4.5, 25.0] (122)                                  | 13.7 [4.7, 25.5] (19)                               | 0.49           |
| Preβ-2 (mg/dL)                              | 1.3 [0.8, 1.9] (56)                             | 1.5 [1.1, 2.0] (61)                    | 0.16           | 1.4 [0.9, 2.0] (123)                                   | 1.9 [1.5, 2.5] (18)                                 | 0.02           |
| CRP (mg/L)                                  | 1.2 [0.7, 3.4] (117)                            | 1.1 [0.6, 2.9] (137)                   | 0.60           | 1.2 [0.6, 3.3] (263)                                   | 1.6 [0.9, 2.9] (37)                                 | 0.21           |
| VCAM (ng/mL)                                | 1609 [1149, 2238] (117)                         | 1597 [1136, 2319] (142)                | 0.99           | 1609 [1124, 2270] (262)                                | 2001 [1418, 2492] (39)                              | 0.05           |
| Creatinine (mg/dL)                          | 1.0 [0.9, 1.2] (120)                            | 1.1 [0.9, 1.3] (142)                   | 0.02           | 1.1 [0.9, 1.2] (267)                                   | 1.3 [1.0, 2.0] (40)                                 | <0.001         |
| BUN (mg/dL)                                 | 22.0 [17.0, 26.0] (119)                         | 23.0 [19.0, 29.0] (142)                | 0.05           | 22.0 [18.0, 27.0] (266)                                | 31.5 [22.0, 43.5] (40)                              | <0.001         |
| Estimated GFR (ml/min/1.73 m <sup>2</sup> ) | 64.8 [56.3, 76.6] (120)                         | 63.0 [48.7, 72.6] (142)                | 0.04           | 64.8 [53.2, 76.5] (267)                                | 50.5 [35.4, 66.1] (40)                              | <0.001         |
| Cystatin C (mg/L)*                          | 0.9 [0.8, 1.1] (87)                             | 1.0 [0.9, 1.2] (105)                   | 0.008          | 0.9 [0.8, 1.1] (192)                                   | 1.4 [1.1, 1.8] (33)                                 | <0.001         |

Supplementary Table 2. Risk Factor Profiles Among Diabetic Micro and Macrovascular Complications

|                                             | Neuropathy                                       |                                               |                | Cardiovascular Disease                           |                                               |                |
|---------------------------------------------|--------------------------------------------------|-----------------------------------------------|----------------|--------------------------------------------------|-----------------------------------------------|----------------|
|                                             | No Neuropathy<br>Median [Q1, Q3] (N)<br>or % (N) | Neuropathy<br>Median [Q1, Q3] (N)<br>or % (N) | <i>p</i> value | No CV Disease<br>Median [Q1, Q3] (N)<br>or % (N) | CV Disease<br>Median [Q1, Q3] (N)<br>or % (N) | <i>p</i> value |
| Age (years)                                 | 64.8 [61.1, 70.1] (119)                          | 69.2 [63.4, 74.2] (183)                       | <0.001         | 66.1 [60.7, 72.1] (171)                          | 68.4 [63.5, 73.6] (161)                       | 0.02           |
| Duration of diabetes (years)                | 54.0 [52.0, 56.0] (119)                          | 55.0 [52.0, 60.0] (183)                       | 0.009          | 54.0 [52.0, 59.0] (171)                          | 56.0 [52.0, 60.0] (161)                       | 0.03           |
| Male Gender                                 | 38.7 (46)                                        | 50.3 (92)                                     | 0.05           | 40.9 (70)                                        | 54.0 (87)                                     | 0.02           |
| + Smoking history                           | 39.1 (45)                                        | 40.9 (72)                                     | 0.76           | 39.1 (66)                                        | 44.9 (71)                                     | 0.28           |
| Weight (kg)                                 | 69.7 [61.4, 79.3] (119)                          | 73.6 [64.2, 85.0] (181)                       | 0.03           | 70.5 [61.1, 79.9] (171)                          | 72.0 [63.1, 84.7] (161)                       | 0.07           |
| Height (cm)                                 | 163.0 [158.5, 171.0] (119)                       | 167.6 [160.5, 176.3] (181)                    | 0.003          | 165.1 [158.5, 173.5] (171)                       | 167.6 [161.0, 175.3] (161)                    | 0.05           |
| Systolic BP (mmHg)                          | 136.0 [121.0, 154.0] (98)                        | 134.0 [120.0, 146.0] (157)                    | 0.16           | 138.0 [124.0, 150.0] (123)                       | 128.0 [118.0, 146.0] (134)                    | 0.01           |
| Diastolic BP (mmHg)                         | 60.0 [58.0, 68.0] (98)                           | 60.0 [56.0, 66.0] (157)                       | 0.09           | 60.0 [58.0, 68.0] (123)                          | 60.0 [56.0, 64.0] (134)                       | 0.008          |
| Mean Arterial Pressure (mmHg)               | 85.7 [80.0, 94.7] (98)                           | 84.7 [78.0, 92.7] (157)                       | 0.09           | 86.7 [80.7, 95.3] (123)                          | 83.3 [76.7, 91.0] (134)                       | 0.004          |
| Heart Rate (bpm)                            | 74.0 [68.0, 84.0] (98)                           | 72.0 [64.0, 84.0] (156)                       | 0.31           | 76.0 [68.0, 88.0] (123)                          | 72.0 [64.0, 81.5] (132)                       | 0.002          |
| Current HbA <sub>1c</sub> (%)               | 7.2 [6.6, 7.8] (117)                             | 7.2 [6.7, 7.9] (176)                          | 0.80           | 7.2 [6.6, 7.7] (167)                             | 7.3 [6.7, 8.0] (156)                          | 0.06           |
| Total cholesterol (mg/dL)                   | 168.0 [150.0, 185.0] (105)                       | 157.5 [141.5, 183.0] (164)                    | 0.15           | 171.0 [153.0, 190.5] (156)                       | 150.0 [132.0, 172.0] (141)                    | <0.001         |
| Triglycerides (mg/dL)                       | 65.0 [45.0, 93.0] (105)                          | 66.5 [46.5, 95.5] (164)                       | 0.86           | 64.0 [45.0, 95.5] (156)                          | 69.0 [50.0, 98.0] (141)                       | 0.20           |
| HDL (mg/dL)                                 | 62.0 [48.0, 77.0] (105)                          | 60.0 [48.0, 74.5] (164)                       | 0.76           | 64.0 [51.5, 80.5] (156)                          | 55.0 [44.0, 69.0] (141)                       | <0.001         |
| LDL (mg/dL)                                 | 90.0 [73.0, 106.0] (105)                         | 82.0 [71.0, 96.5] (164)                       | 0.11           | 90.5 [76.0, 105.5] (156)                         | 78.0 [64.0, 90.0] (141)                       | <0.001         |
| LP(a) (mg/dL)                               | 6.9 [3.9, 23.1] (35)                             | 10.2 [4.7, 28.5] (77)                         | 0.31           | 7.6 [3.6, 23.1] (70)                             | 11.0 [6.6, 29.2] (66)                         | 0.04           |
| Preβ-2 (mg/dL)                              | 1.4 [0.8, 1.8] (35)                              | 1.6 [1.1, 2.3] (77)                           | 0.12           | 1.2 [0.8, 1.8] (71)                              | 1.7 [1.1, 2.4] (65)                           | 0.006          |
| CRP (mg/L)                                  | 1.1 [0.7, 2.6] (105)                             | 1.2 [0.6, 2.9] (161)                          | 0.97           | 1.0 [0.5, 2.2] (152)                             | 1.6 [0.9, 4.2] (137)                          | <0.001         |
| VCAM (ng/mL)                                | 1445 [959, 2172] (103)                           | 1621 [1206, 2238] (157)                       | 0.02           | 1534 [1133, 2167] (150)                          | 1741 [1245, 2408] (140)                       | 0.08           |
| Creatinine (mg/dL)                          | 1.0 [0.9, 1.2] (105)                             | 1.1 [1.0, 1.3] (164)                          | 0.02           | 1.0 [0.9, 1.2] (155)                             | 1.1 [0.9, 1.4] (141)                          | <0.001         |
| BUN (mg/dL)                                 | 21.0 [17.0, 25.0] (105)                          | 23.0 [18.0, 28.5] (164)                       | 0.006          | 20.0 [17.0, 25.0] (155)                          | 24.0 [19.0, 32.5] (140)                       | <0.001         |
| Estimated GFR (ml/min/1.73 m <sup>2</sup> ) | 64.8 [52.2, 76.9] (105)                          | 63.1 [52.1, 73.6] (164)                       | 0.23           | 67.1 [53.5, 77.0] (155)                          | 59.4 [47.7, 69.2] (141)                       | 0.001          |
| Cystatin C (mg/L)*                          | 0.9 [0.8, 1.1] (76)                              | 1.0 [0.9, 1.2] (121)                          | 0.004          | 0.9 [0.8, 1.1] (113)                             | 1.0 [0.9, 1.3] (103)                          | <0.001         |

Supplementary Table 3. Association of Complications with Advanced Glycation Endproducts

| Medalists vs. Age-Matched Controls |                                               | All Medalists                                 | Age-Matched Controls     | P*                      | P**    | P***   |        |
|------------------------------------|-----------------------------------------------|-----------------------------------------------|--------------------------|-------------------------|--------|--------|--------|
|                                    |                                               | CML ( $\mu\text{mol/mol}$ lysine)             | 59.8 [49.3, 72.0] (324)  | 29.8 [26.4, 34.0] (23)  | <0.001 | <0.001 | NA     |
|                                    | CEL ( $\mu\text{mol/mol}$ lysine)             | 5.3 [4.6, 6.0] (324)                          | 4.2 [3.7, 4.8] (23)      | <0.001                  | <0.001 | NA     |        |
|                                    | Fructose-lysine ( $\mu\text{mol/mol}$ lysine) | 1004 [718, 1392] (322)                        | 855 [675, 944] (20)      | 0.02                    | 0.03   | NA     |        |
|                                    | Pentosidine (pmol/mg protein)                 | 1.0 [0.6, 1.9] (329)                          | 1.1 [0.8, 1.3] (23)      | 0.87                    | 0.50   | NA     |        |
| Any Complications                  |                                               | No Severe Complications                       | Any Severe Complications |                         |        |        |        |
|                                    |                                               | CML ( $\mu\text{mol/mol}$ lysine)             | 55.8 [46.5, 62.9] (37)   | 59.9 [49.7, 73.2] (262) | 0.08   | 0.06   | 0.06   |
|                                    |                                               | CEL ( $\mu\text{mol/mol}$ lysine)             | 4.9 [4.5, 5.5] (37)      | 5.4 [4.7, 6.0] (262)    | 0.009  | 0.01   | 0.01   |
|                                    |                                               | Fructose-lysine ( $\mu\text{mol/mol}$ lysine) | 960 [722, 1253] (37)     | 1014 [724, 1437] (260)  | 0.20   | 0.12   | 0.13   |
|                                    |                                               | Pentosidine (pmol/mg protein)                 | 0.8 [0.5, 1.1] (38)      | 1.1 [0.6, 2.0] (266)    | 0.02   | 0.15   | 0.14   |
| Retinopathy                        |                                               | No-mild NPDR                                  | PDR                      |                         |        |        |        |
|                                    |                                               | CML ( $\mu\text{mol/mol}$ lysine)             | 60.1 [50.8, 71.9] (122)  | 58.1 [48.7, 72.5] (151) | 0.99   | 0.57   | 0.53   |
|                                    |                                               | CEL ( $\mu\text{mol/mol}$ lysine)             | 5.2 [4.7, 5.9] (122)     | 5.4 [4.7, 6.2] (151)    | 0.29   | 0.08   | 0.10   |
|                                    |                                               | Fructose-lysine ( $\mu\text{mol/mol}$ lysine) | 1051 [766, 1387] (122)   | 992 [718, 1413] (149)   | 0.75   | 0.69   | 0.62   |
|                                    |                                               | Pentosidine (pmol/mg protein)                 | 0.9 [0.6, 1.8] (126)     | 1.1 [0.6, 2.2] (152)    | 0.58   | 0.78   | 0.79   |
| Nephropathy                        |                                               | No microalbuminuria                           | Microalbuminuria         |                         |        |        |        |
|                                    |                                               | CML ( $\mu\text{mol/mol}$ lysine)             | 59.2 [49.2, 71.9] (279)  | 62.9 [50.5, 79.5] (41)  | 0.33   | 0.18   | 0.25   |
|                                    |                                               | CEL ( $\mu\text{mol/mol}$ lysine)             | 5.3 [4.6, 5.9] (279)     | 5.7 [5.0, 6.7] (41)     | 0.01   | 0.001  | <0.001 |
|                                    |                                               | Fructose-lysine ( $\mu\text{mol/mol}$ lysine) | 1004 [725, 1381] (279)   | 1113 [686, 1505] (39)   | 0.57   | 0.56   | 0.65   |
|                                    |                                               | Pentosidine (pmol/mg protein)                 | 1.0 [0.6, 1.9] (283)     | 1.2 [0.8, 2.2] (42)     | 0.22   | 0.27   | 0.17   |
| Neuropathy                         |                                               | No Neuropathy                                 | Neuropathy               |                         |        |        |        |
|                                    |                                               | CML ( $\mu\text{mol/mol}$ lysine)             | 57.1 [48.2, 68.6] (110)  | 60.6 [50.5, 74.5] (171) | 0.05   | 0.44   | 0.55   |
|                                    |                                               | CEL ( $\mu\text{mol/mol}$ lysine)             | 5.0 [4.4, 5.9] (110)     | 5.5 [4.7, 6.0] (171)    | 0.03   | 0.42   | 0.55   |
|                                    |                                               | Fructose-lysine ( $\mu\text{mol/mol}$ lysine) | 989 [700, 1313] (109)    | 1050 [773, 1440] (170)  | 0.11   | 0.27   | 0.31   |
|                                    |                                               | Pentosidine (pmol/mg protein)                 | 0.8 [0.5, 1.8] (112)     | 1.1 [0.6, 1.9] (174)    | 0.08   | 0.45   | 0.39   |
| Cardiovascular Disease             |                                               | No CV Disease                                 | + CV Disease             |                         |        |        |        |
|                                    |                                               | CML ( $\mu\text{mol/mol}$ lysine)             | 59.9 [50.3, 70.1] (157)  | 60.5 [50.1, 75.9] (148) | 0.53   | 0.39   | 0.55   |
|                                    |                                               | CEL ( $\mu\text{mol/mol}$ lysine)             | 5.1 [4.6, 5.8] (157)     | 5.6 [4.8, 6.4] (148)    | 0.005  | 0.03   | 0.04   |

|  |                                                                |                        |                        |      |      |      |
|--|----------------------------------------------------------------|------------------------|------------------------|------|------|------|
|  | <b>Fructose-lysine (<math>\mu\text{mol/mol lysine}</math>)</b> | 1004 [766, 1342] (157) | 1054 [686, 1489] (146) | 0.62 | 0.65 | 0.78 |
|  | <b>Pentosidine (pmol/mg protein)</b>                           | 0.9 [0.6, 1.6] (159)   | 1.2 [0.6, 2.4] (151)   | 0.09 | 0.17 | 0.14 |

\**p* value unadjusted

\*\**p* value from logistic regression analysis adjusted for current age of subject

\*\*\**p* value from logistic regression analysis adjusted for current age of subject, duration of DM, and HbA<sub>1c</sub>
